# Supplementary material
Source: publisher figshare collection journal article supplement (https://aacr.figshare.com/articles/dataset/_/22447229)

Supplementary Figure 1.

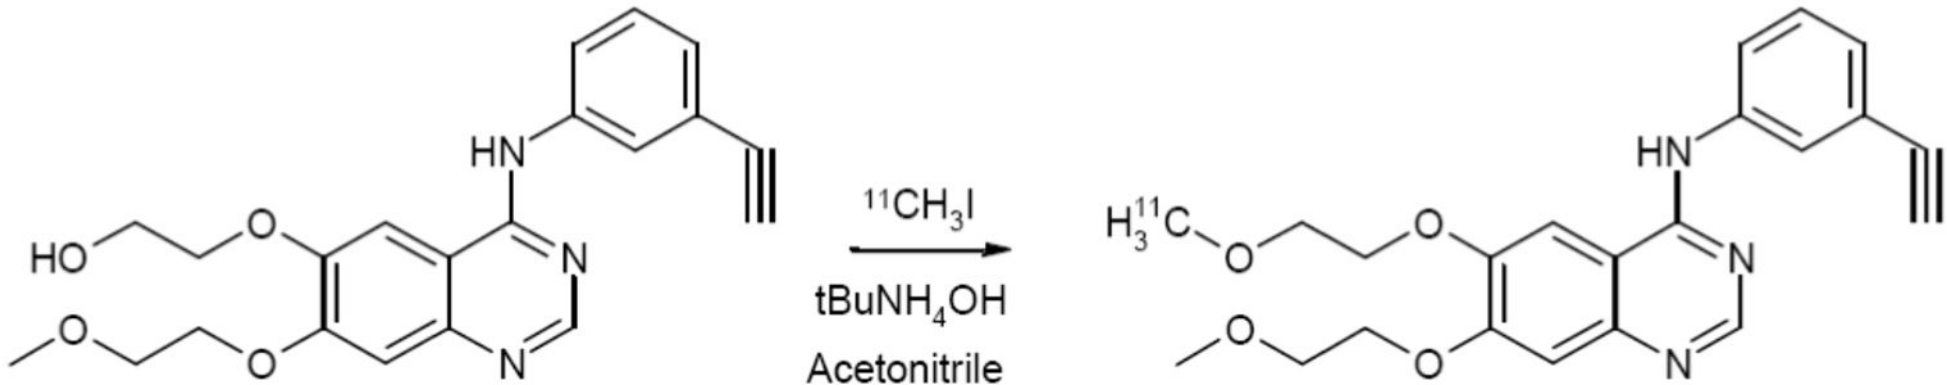

Supplement: Supplementary file 1 [file 39898262]
